# Supplementary material for: Overexpression of the Wild Soybean R2R3-MYB Transcription Factor GsMYB15 Enhances Resistance to Salt Stress and Helicoverpa Armigera in Transgenic Arabidopsis
Source: PubMed Central journal article supplement (PMC6321161; doi:10.3390/ijms19123958), 2018-12-09
Supplement: ijms-19-03958-s001.pdf [file ijms-19-03958-s001.pdf]

Supplementary materials

**Supplementary Table S1.** Primers used for real – time RT-PCR.

| Gene name                                 | Forward primer (5' to 3') | Reverse primer (5' to 3') | Product (bp) |
|-------------------------------------------|---------------------------|---------------------------|--------------|
| <i>GsMYB15</i> (MH796674)                 | ATATCACTCGTTATGGCTCTTGG   | TAGTTCCTCTTTTTATGTTGGG    | 127          |
| <i>GmMYB15</i> ( <i>Glyma.12g199200</i> ) | ATATCACTCGTTATGGCTCTTGG   | TAGTTCCTCTTTTTATGTTGGG    | 127          |
| <i>SKIP16</i> ( <i>Glyma.12g05510</i> )   | GAGCCCAAGACATTGCGAGAG     | CGGAAGCGAAGAAGACTGAACC    |              |
| <i>AtABI1</i> (AT4G26080)                 | GTTTTCCCGTCTCACATCTTCGT   | CTTCATCCGTCATTACATCCCAA   | 325          |
| <i>AtABI2</i> (AT5G57050)                 | TTGTCTTTCCGACTCACATCTTT   | CTTTCCTTCTCCTCTTTTCTCC    | 429          |
| <i>AtRD29B</i> (AT5G52300)                | GAGGATCGGATTATCTCAGTGGT   | TCTGTGTAGGTGCTTGGTTTTGT   | 439          |
| <i>AtRD20</i> (AT2G33380)                 | ATCGACAACATACACAAAGCCAA   | TCCATCAAAGCAACCTCTCACAG   | 285          |
| <i>AtDREB2A</i> (AT5G05410)               | TGGAAAGAGTATAACGAGACCGT   | CCTCATCATAAGCAGAAGCAGCT   | 247          |
| <i>AtMYB2</i> (AT2G47190)                 | TTCAATTCAGCCAGAATCATCAT   | AAAAACTCTCCTCGTCAGTCCAC   | 213          |
| <i>AtRD26</i> (AT4G27410)                 | CATGTTTCACATTGTAGGGGAG    | CGAGGAAGATTAAGACTGGTC     | 499          |
| <i>AtGSTU17</i> (AT1G10370)               | TCTAAACCTCAAGTCTGTCCCT    | GCTTCTTCTCTTCTCTCTCTCC    | 309          |
| <i>AtSnRK2.4</i> (AT1G10940)              | TCTCCTTTCCCGTATATTTGTCTG  | TATGCAGCTTGAGCTGTCTCTGT   | 123          |
| <i>AtHAL3</i> (AT1G48605)                 | TAGCTGCAAGTGAAGTGTGG      | TTGATGGGAGGAATTAGGGTG     | 439          |
| <i>AtANAC019</i> (AT1G52890)              | AAGAAGCAATCAAGTGCACAAAA   | TTCAAAGTGAGAAGAAGACGACG   | 111          |
| <i>AtWRKY25</i> (AT2G30250)               | CTCCGATTACCTTGATTCTCCTC   | TTTTCGCTCTTCTTCACTTGTTT   | 357          |
| <i>AtWRKY33</i> (AT2G38470)               | TTTTTCTCGATTCCCCTGCTT     | CTCGGTTTGGCTCCATTGTTC     | 293          |
| <i>AtWRKY46</i> (AT2G46400)               | TAACAACATCACATCCCCGAAGA   | GCAGCAGGTGCAGATAAAACCTC   | 315          |
| <i>AtActin2</i> (NM_180280)               | GGATCTGTACGGTAACATTGTGC   | AACCACCGATCCAGACACTGT     | 982          |
| <i>HaPGRPA</i> (GU182905)                 | CCAGATGTGCTGAGATCGTG      | TTTGCCGTTACCACCTACAA      | 94           |
| <i>HaPGRC</i> (GU182906)                  | AGCTGAGGTACCCACAGACG      | CCAGCCCAAGCTGTTATGAT      | 143          |
| <i>HaGNRP</i> (GU182914)                  | CACCTTGCATTACGGACCTT      | TGTTACAGTCCCAGTTCCA       | 159          |
| <i>HaGali</i> (GU182907)                  | TGGTGAAGAGCTACCGTTCC      | ACGCAGTACCAATCAGCTT       | 102          |
| <i>HaGlo</i> (GU182908)                   | GCAAGACATCTTCAACGACCA     | TCCTTGACACATCAAGACTGG     | 140          |
| <i>HaLys</i> (GU182915)                   | GAAGGACTGCAATGTTACTTG     | GCCTCGAACTTGTGGCGTTTG     | 90           |
| <i>HaCec</i> (GU182916)                   | GTTTGGTAGCAGCGTGCAG       | GCTTACCAGGACTGCTAT        | 130          |
| <i>HaCecA</i> (GU182909)                  | TGTCTTCGCTTGTTTGTGG       | ATCACGAATGTGCTGACCAA      | 93           |
| <i>HaCecB</i> (GU182910)                  | GTTGTTCTGTTCTCGCGTGT      | ACCGTCCCTGATGTTACGAC      | 104          |
| <i>HaMor</i> (GU182911)                   | GCATTACTGGTGCCATCTGA      | CTATGTTGATCGCCCGGAGT      | 95           |
| <i>HaCob</i> (GU182912)                   | TGTGCTAGTTGTTATAAGTGCCATT | CTACCTGCACCGAGTTGTCA      | 117          |
| <i>HaGallF1</i> (GU182913)                | ACAAGGGCCACCTCTTCCAG      | AAGTGCAGTATCCGCCAGAC      | 84           |
| <i>HaLip</i> (DQ875243)                   | CTTATAGGGTGCGACCAACG      | ACGTCCGAGTTACAGCGAAG      | 604          |
| <i>HaCTL3</i> (JQ250828)                  | GATGTAAGGTGGAGGGAGCA      | GCAGGTTCTCAGCAGAATC       | 141          |
| <i>Ha18s</i> (AB620126)                   | GCATCTTTCAAATGTCTGC       | TACTCATTCCGATTACGAG       | 219          |
| <i>AtPR1</i> (AT2G14610)                  | TCTTCCCTCGAAAGCTCAAGA     | AGACAAGTACCCGCTACCCCA     | 211          |
| <i>AtPR5</i> (AT1G75040)                  | TCAGAACAAATGTCGTGGCCTG    | CTCGTTTCTGTCGTCATAAGCG    | 171          |
| <i>AtEDR1</i> (AT1G08720)                 | GCTTACACACCAGTACCCGACA    | CTAGTCCCAAAGTATTACCCCG    | 243          |
| <i>AtACS6</i> (AT4G11280)                 | TAGATGGTTTAGGGATTGGTTGG   | GACACGTTGAGCTTCACTTGGTG   | 145          |
| <i>AtPDF1.2</i> (AT5G44420)               | CATCACCCCTTATCTTCGCTGC    | AACCCCTGACCATGTCCCACT     | 109          |
| <i>AtPAD4</i> (AT3G52430)                 | GGAAACCAATCTCTCCACCTC     | ACATTCCTTACTAAAACGCCAC    | 399          |
| <i>AtAPX1</i> (AT1G07890)                 | GAAGAGAGGACAAGCCCCAAC     | CAGCGTAATCAGCGAAAAAGG     | 357          |
| <i>AtVSP1</i> (AT5G24780)                 | CGCTCTATCTCCATTTACGA      | ATCTCAACCAAATCAGCCCA      | 425          |
| <i>AtFRK1</i> (At2g19190)                 | GCCAACGGAGACATTAGAG       | CCATAACGACCTGACTCATC      | 219          |
| <i>AtVSP1</i> (At5G24780)                 | CGCTCTATCTCCATTTACGA      | ATCTCAACCAAATCAGCCCA      | 276          |
| <i>AtTAT1</i> (At5G53970)                 | CCCTCAAAGACGTCAATGGT      | ACACGACACGACAAGTCCAA      | 273          |
| <i>AtLOX2</i> (At3G45140)                 | TTGGTGTGGTAACTACGATTGC    | CACCAGCTCCAGCTCTATTCTT    | 417          |
| <i>AtWRKY53</i> (At4G23810)               | CACCAGAGTCAAACCAGCCATTAC  | CTTACCATCATCAAGCCATCGG    | 101          |
| <i>AtCYP79B2</i> (At4G39950)              | TAACGGTACAGAGAAGATTATG    | GAGTTCCTTTCTTCTCTCCA      | 107          |

**Supplementary Table S2.** Physicochemical property analysis for *GsMYB15*.

| Gene name      | Gene ID  | Amino acid residues | MW (Da)   | pI   | instabilit y index | Aliphatic index | GRAVY  | Chromosome |
|----------------|----------|---------------------|-----------|------|--------------------|-----------------|--------|------------|
| <i>GsMYB15</i> | MH796674 | 313                 | 35,459.52 | 5.62 | 41.95              | 72.27           | -0.607 | 12         |
